# Supplementary material
Source: PubMed Central journal article supplement (PMC7486269)

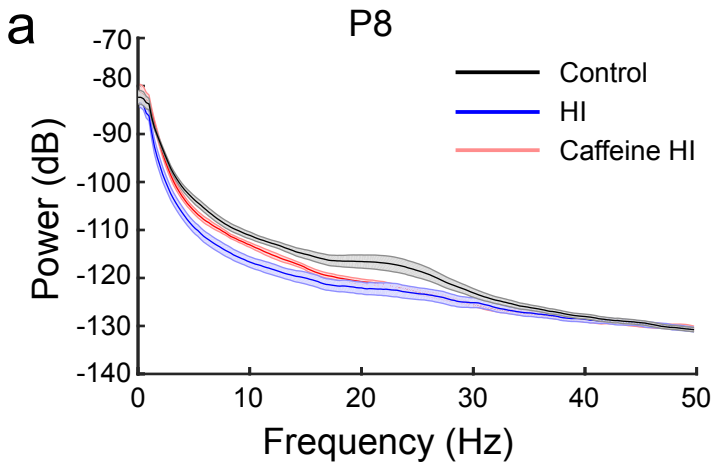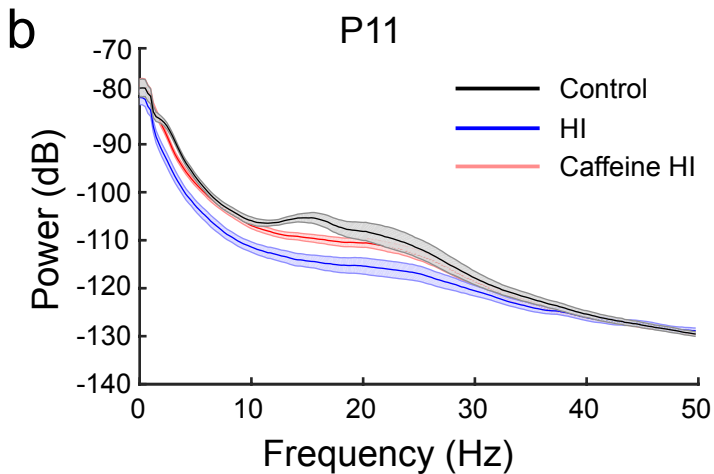

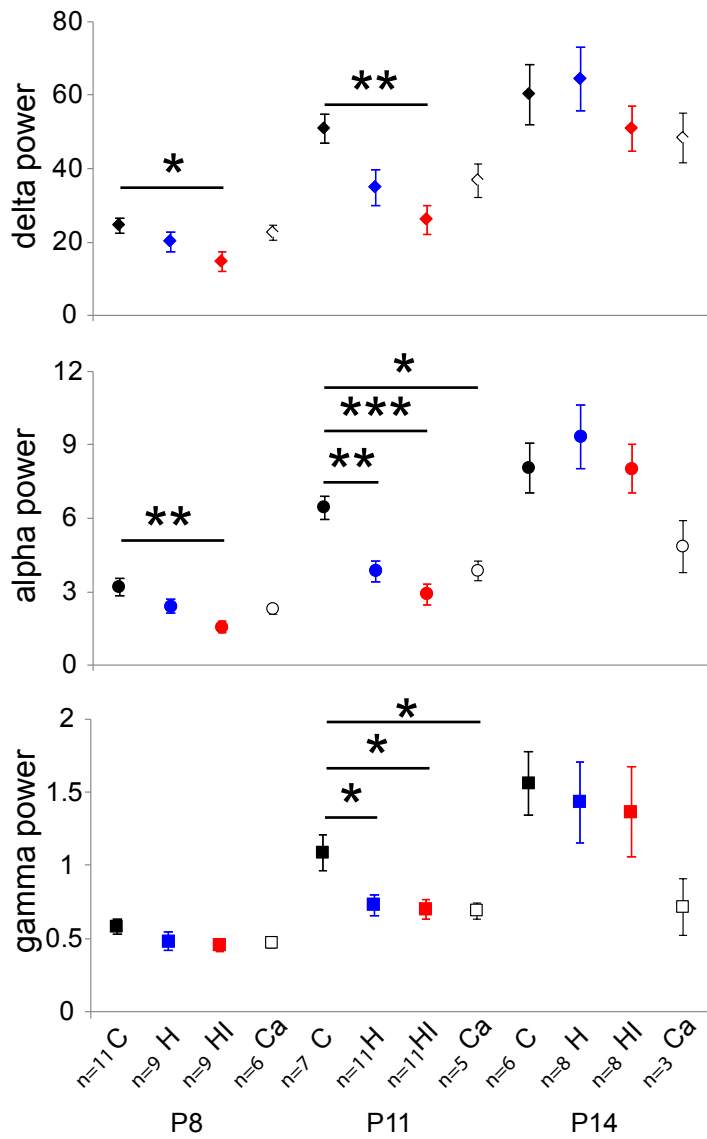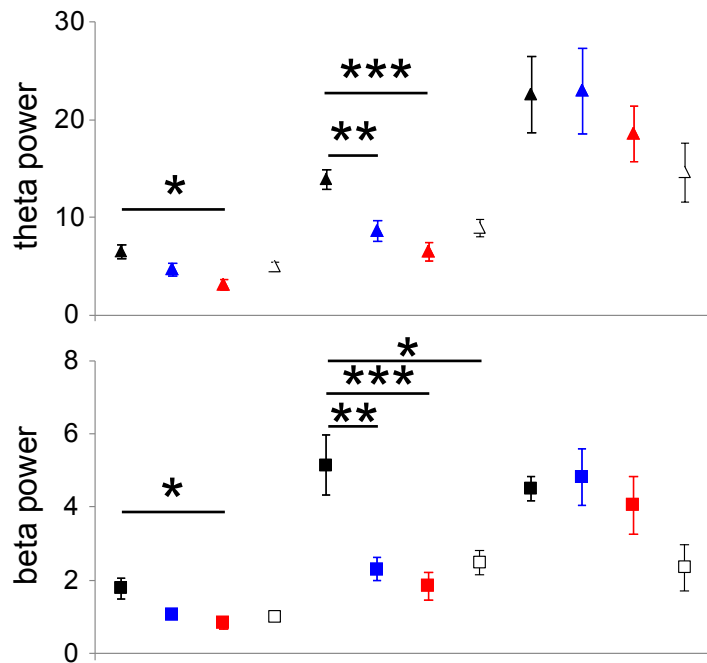

Supplement: NIHMS1615638-supplement-1.pdf [file NIHMS1615638-supplement-1.pdf]
